# Supplementary material for: Layered double hydroxide derived NiAl-oxide hollow nanospheres for selective transfer hydrogenation with improved stability
Source: Royal Society of Chemistry journal article supplement (doi:10.1039/d0ta08363a), 2020-01-01
Supplement: d0ta08363a1.pdf [file d0ta08363a1.pdf]

**Electronic Supplementary Information (ESI)**

**Layered double hydroxide derived NiAl-oxide hollow nanospheres for selective transfer hydrogenation with improved stability**

Zhengyi Pan,<sup>a</sup> Haibin Jiang,<sup>a</sup> Bingbing Gong,<sup>b</sup> Rong Luo,<sup>a</sup> Wenhua Zhang,<sup>\*b</sup> and  
Guang-Hui Wang<sup>\*a</sup>

<sup>a</sup> Department Key Laboratory of Biofuels, Qingdao Institute of Bioenergy and Bioprocess Technology, Chinese Academy of Sciences, Qingdao 266101, China

<sup>b</sup> Department Hefei National Laboratory for Physical Sciences at the Microscale, Department of Materials Science and Engineering, University of Science and Technology of China, Hefei 230026, China

\* Corresponding author:

E-mail: whhzhang@ustc.edu.cn (W. Zhang); wanggh@qibebt.ac.cn (G.-H. Wang)

## 1. Experimental Details

### *Materials*

Hexamethylenetetramine (HMT), 2,4-dihydroxybenzoic acid (DA) and Pluronic P123 were obtained from Sigma-Aldrich. Furfural (FFR), furfuryl alcohol (FOL),  $\text{Na}_2\text{CO}_3$ , NaOH,  $\text{Ni}(\text{NO}_3)_2 \cdot 6\text{H}_2\text{O}$  and  $\text{Al}(\text{NO}_3)_3 \cdot 9\text{H}_2\text{O}$  were purchased from Sinopharm Chemical Reagent Company. 5-hydroxymethylfurfural (HMF), 2,5-bis-(hydromethyl)-furan (BHMF), *trans*-cinnamaldehyde, cinnamyl alcohol, citral (cis- and trans- mixture), geraniol, nerol, 2-ethyl-2-hexenal, 2-ethylhex-2-enol and sodium oleate were acquired from Aladdin.

### *Synthesis of hollow polymer nanospheres (HPS)*

The HPS sample was prepared according to the method reported previously with a slight modification.<sup>1</sup> In a typical preparation, 181 mg of DA and 0.071 g of HMT were dissolved in 60 mL of deionized water to form the solution A. 50 mg of Pluronic P123 and 73 mg of sodium oleate were dissolved in 20 mL of deionized water to form the solution B. Then, the solution B was added into the solution A under slow stirring at room temperature. After stirring for 15 min, the mixed solution was transferred into a Teflon-lined stainless-steel autoclave of 120 mL capacity, sealed and then maintained at 160 °C for 4 h. After cooling to room temperature, the product was collected by centrifugation at 14000 r.p.m. for 15 min, washed with the deionized water for 3 times, and dried at 50 °C under vacuum for 8 h.

### *Synthesis of pure NiO-t and solid Ni<sub>3</sub>Al<sub>1</sub>-t samples*

Pure NiO-t nanoparticles and solid Ni<sub>3</sub>Al<sub>1</sub>-t were prepared by the same procedure

as mentioned in the main text, but in the absence of HPS and  $\text{Al}(\text{NO}_3)_3 \cdot 9\text{H}_2\text{O}$  for pure NiO-t, and in the absence of HPS for solid  $\text{Ni}_3\text{Al}_1$ -t, respectively.

## 2. Catalyst characterization

Thermogravimetric analysis (TGA) was carried out on a NETZSCH STA 449F5 thermal analyzer under a dynamic air atmosphere (20 mL/min) in the temperature range between 25 and 700 °C, with a heating rate of 10 °C/min. X-ray diffraction (XRD) patterns were got on a Bruker D8 Advance powder diffractometer using Cu  $K\alpha$  radiation ( $\lambda = 0.1541$  nm) operated at 40 kV and 40 mA. Crystallite size ( $D_c$ ) was calculated using the Scherrer equation,  $D_c = K \lambda / (\beta \cos \theta)$ , where the constant  $K$  is adopted as 0.9 here,  $\lambda$  is the wavelength of the X-ray radiation,  $\beta$  is the width of the peak at half-maximum, and  $\theta$  is the Bragg angle.  $\text{N}_2$  adsorption-desorption was performed on a Micromeritics 3Flex instrument at -196 °C. The obtained  $h$ -NiAl catalysts were pretreated in vacuum at 200 °C for 6 h before measurement. The Brunauer-Emmett-Teller (BET) equation was used to calculate the specific surface area ( $S_{BET}$ ). The pore volume ( $V_p$ ) was estimated at a relative pressure of 0.99. The average pore diameter ( $d_p$ ) was calculated using  $d_p = 4V_p/S_{BET}$ . The pore size distribution was determined by the Barret-Joyner-Halenda (BJH) method using the desorption branch of the isotherm. The sample reducibility and the interaction between  $\text{Al}^{3+}$  species and Ni-O sites were characterized by the  $\text{H}_2$  temperature-programmed reduction ( $\text{H}_2$ -TPR) on a Micromeritics AutoChem II 2920 instrument. For this process, 30 mg precursor was loaded into a quartz U-shaped tube and reduced

in a 10 vol % H<sub>2</sub>/Ar flow (20 mL/min) at a heating rate of 10 °C/min. The hydrogen consumption was determined by a thermal conductivity detector (TCD). The NH<sub>3</sub> or CO<sub>2</sub> temperature-programmed desorption (NH<sub>3</sub>/CO<sub>2</sub>-TPD) characterization was conducted on the same equipment as with H<sub>2</sub>-TPR. 100 mg catalyst was purged with an Ar or He flow (20 mL/min) at 250 °C for 1 h and then cooled to 100 °C. After NH<sub>3</sub> or CO<sub>2</sub> adsorption until saturation, the sample was flushed with an Ar or He flow (20 mL/min) to remove the physically adsorbed NH<sub>3</sub> or CO<sub>2</sub>. Subsequently, NH<sub>3</sub>/CO<sub>2</sub>-TPD was implemented at a heating rate of 5 °C/min with a TCD to detect the desorbed NH<sub>3</sub> or CO<sub>2</sub>.

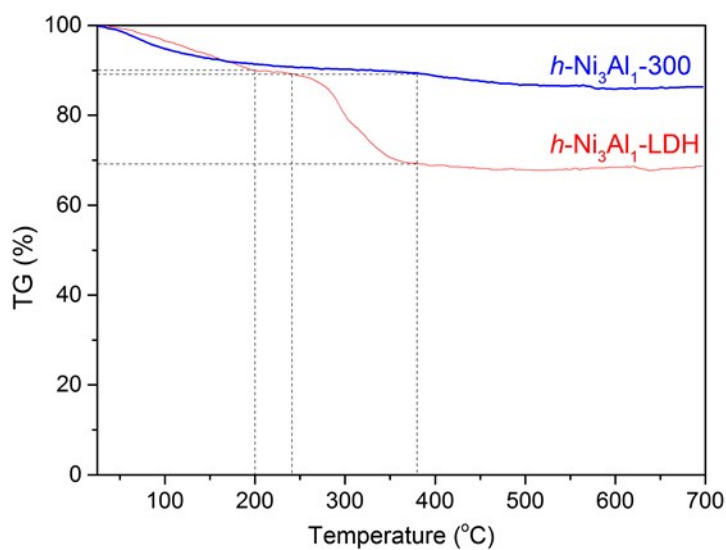

**Fig. S1** TGA curves of HPS@Ni<sub>3</sub>Al<sub>1</sub>-LDH and *h*-Ni<sub>3</sub>Al<sub>1</sub>-300.

As shown in Fig. S1, for HPS@Ni<sub>3</sub>Al<sub>1</sub>-LDH, the weight loss below 200 °C is due to the removal of physical adsorbed and bond water;<sup>2</sup> the weight loss in the range of 240~375 °C is mainly due to the removal of HPS template; almost no weight loss occurs when the temperature is above 375 °C. In contrast, for *h*-Ni<sub>3</sub>Al<sub>1</sub>-300, there is almost no weight loss in the range of 240~375 °C, indicating that the HPS template can be removed completely after calcination at 300 °C for 5 h (*h*-Ni<sub>3</sub>Al<sub>1</sub>-300).

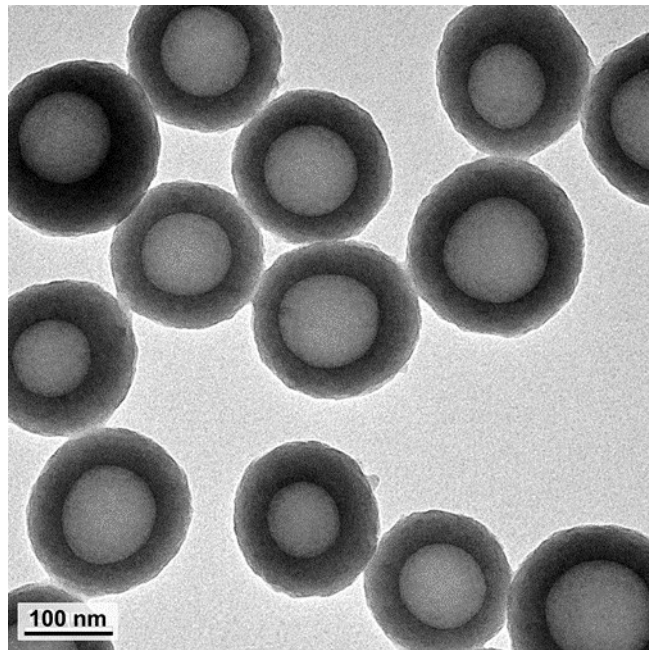

**Fig. S2** TEM image of HPS with a diameter of about 185 nm.

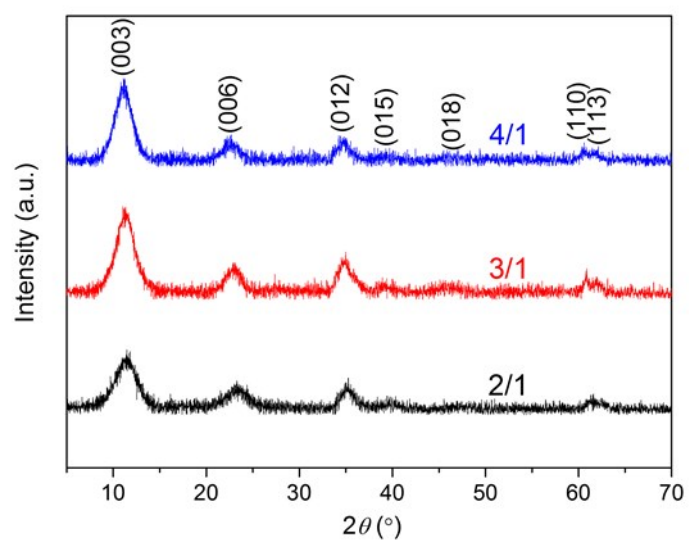

**Fig. S3** XRD patterns of different HPS@Ni<sub>x</sub>-Al<sub>y</sub>-LDH samples (x/y= 4/1, 3/1 or 2/1), indicating the existence of LDH structure in all samples. Note: the number without parentheses on the curve indicates Ni/Al molar ratio.

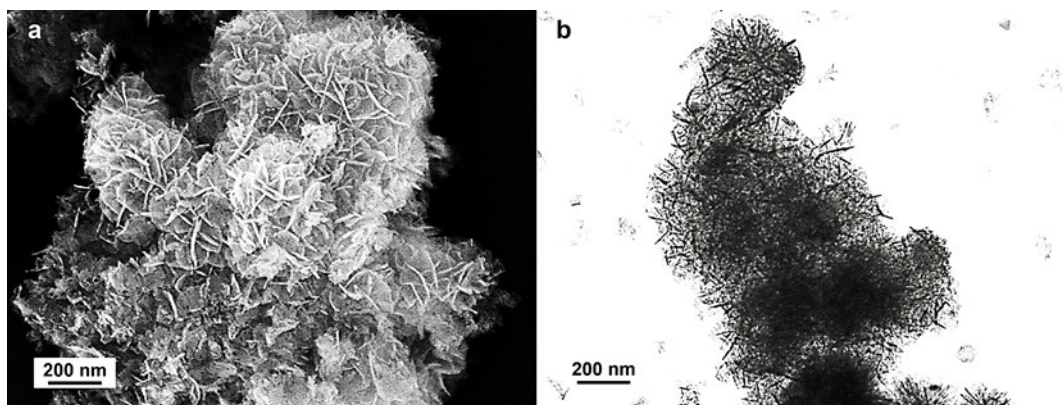

**Fig. S4** (a) SEM and (b) TEM images of  $\text{Ni}_3\text{Al}_1\text{-800}$  without using HPS as template during synthesis.



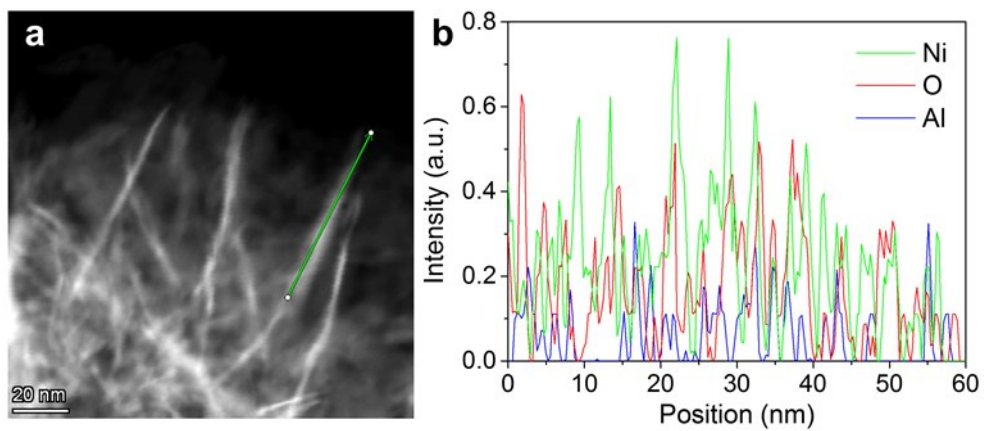

**Fig. S5** (a) STEM image and (b) corresponding EDS line scanning profile (green line in a) of Ni, O and Al elements on  $h$ -Ni<sub>3</sub>Al<sub>1</sub>-800.

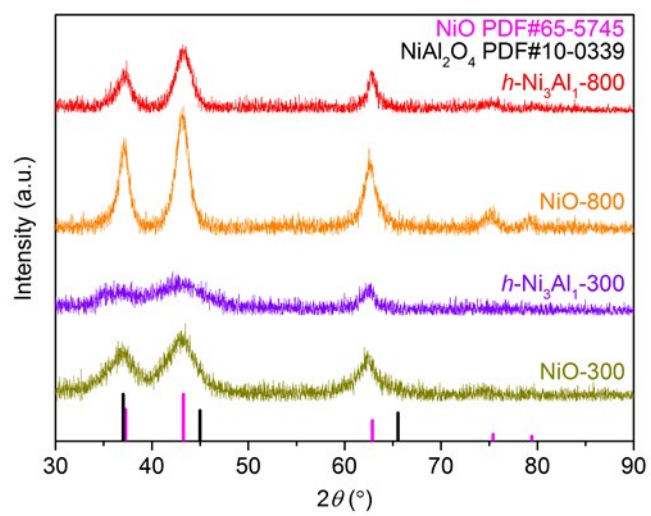

**Fig. S6** XRD patterns of  $h\text{-Ni}_3\text{Al}_1\text{-t}$  and  $\text{NiO-t}$ .

**Table S1** the particle size of NiO ( $D_c$ ) using the Scherrer equation ( $D_c = K \lambda / (\beta \cos \theta)$ ).

| Catal.                                               | $K$ | $\lambda$ | $2\theta$ (°) | $\beta$ (°) | $D_c$ (nm) |
|------------------------------------------------------|-----|-----------|---------------|-------------|------------|
| <i>h</i> -Ni <sub>3</sub> Al <sub>1</sub> -1000      | 0.9 | 0.1541    | 43.287        | 0.822       | 10.4       |
| <i>h</i> -Ni <sub>3</sub> Al <sub>1</sub> -900       | 0.9 | 0.1541    | 43.238        | 1.613       | 5.3        |
| <i>h</i> -Ni <sub>3</sub> Al <sub>1</sub> -800       | 0.9 | 0.1541    | 43.282        | 1.901       | 4.5        |
| spent <i>h</i> -Ni <sub>3</sub> Al <sub>1</sub> -800 | 0.9 | 0.1541    | 43.306        | 1.901       | 4.5        |
| <i>h</i> -Ni <sub>3</sub> Al <sub>1</sub> -700       | 0.9 | 0.1541    | 43.182        | 1.988       | 4.3        |
| <i>h</i> -Ni <sub>3</sub> Al <sub>1</sub> -600       | 0.9 | 0.1541    | 43.266        | 2.036       | 4.2        |
| <i>h</i> -Ni <sub>3</sub> Al <sub>1</sub> -500       | 0.9 | 0.1541    | 43.413        | 2.593       | 3.3        |
| <i>h</i> -Ni <sub>3</sub> Al <sub>1</sub> -300       | 0.9 | 0.1541    | 43.801        | 4.760       | 1.8        |
| spent <i>h</i> -Ni <sub>3</sub> Al <sub>1</sub> -300 | 0.9 | 0.1541    | 43.685        | 4.758       | 1.8        |
| Ni <sub>3</sub> Al <sub>1</sub> -800                 | 0.9 | 0.1541    | 43.257        | 1.782       | 4.8        |
| <i>h</i> -Ni <sub>2</sub> Al <sub>1</sub> -800       | 0.9 | 0.1541    | 43.269        | 2.036       | 4.2        |
| <i>h</i> -Ni <sub>4</sub> Al <sub>1</sub> -800       | 0.9 | 0.1541    | 43.300        | 1.711       | 5.0        |
| NiO-800                                              | 0.9 | 0.1541    | 43.230        | 1.316       | 6.5        |
| NiO-300                                              | 0.9 | 0.1541    | 43.175        | 2.758       | 3.1        |
| spent NiO-300                                        | 0.9 | 0.1541    | 43.101        | 2.757       | 3.1        |
| Al <sub>2</sub> O <sub>3</sub> -800                  | 0.9 | 0.1541    | 45.575        | 1.540       | 5.6        |

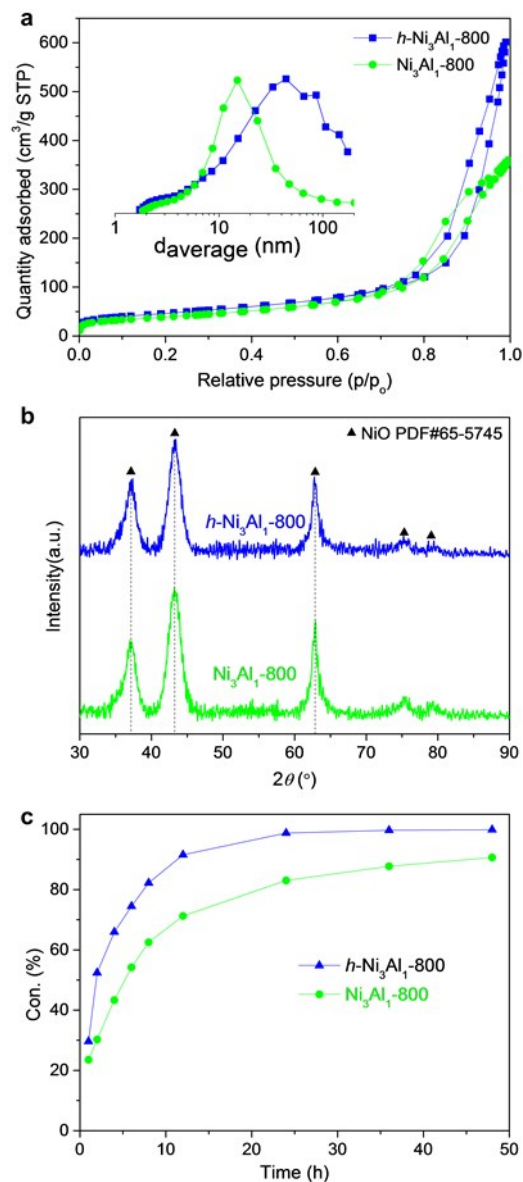

**Fig. S7** (a) N<sub>2</sub> sorption isotherms (insert: pore size distributions) and (b) XRD patterns of *h*-Ni<sub>3</sub>Al<sub>1</sub>-800 and Ni<sub>3</sub>Al<sub>1</sub>-800 and Ni<sub>3</sub>Al<sub>1</sub>-800. (c) Selective transfer hydrogenation of FFR over *h*-Ni<sub>3</sub>Al<sub>1</sub>-800 and Ni<sub>3</sub>Al<sub>1</sub>-800. Reaction conditions: 1.0 mmol FFR, 10 mL 2-propanol, 80 mg catalyst, 120 °C.

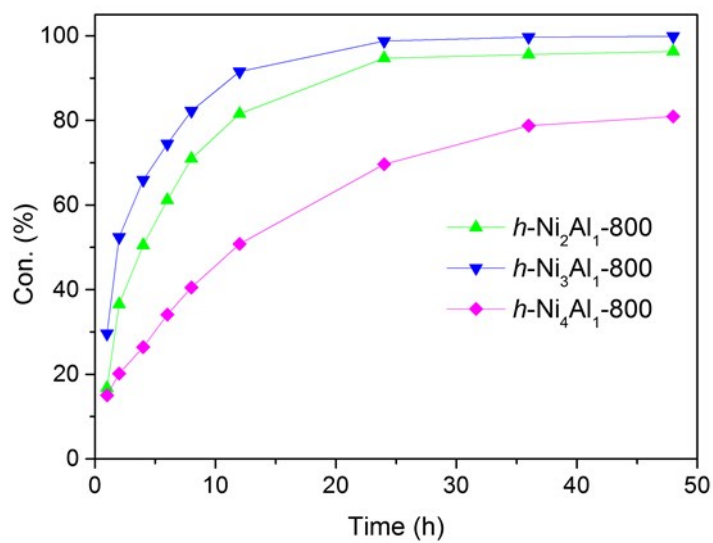

**Fig. S8** Selective transfer hydrogenation of FFR to FOL over different  $h\text{-Ni}_x\text{Al}_y\text{-800}$  ( $x/y= 2/1, 3/1$  or  $4/1$ ) catalysts. Reaction conditions: 1.0 mmol FFR, 10 mL 2-propanol, 80 mg catalyst, 120 °C.

**Table S2** STH of FFR to FOL over different metal oxides in literature.

| Entry | Catal.                                           | Mass ratio <sup>a</sup> | C <sub>initial</sub> <sup>b</sup><br>(mol L <sup>-1</sup> ) | T(°C)                   | t(h) | Conv.(%) | Sel.(%)                  | TOF(h <sup>-1</sup> ) <sup>c,d</sup> | Ref. |
|-------|--------------------------------------------------|-------------------------|-------------------------------------------------------------|-------------------------|------|----------|--------------------------|--------------------------------------|------|
| 1     | La <sub>2</sub> O <sub>3</sub>                   | 0.8                     | 0.03                                                        | 180                     | 3    | 41       | 75                       | <b>0.4</b><br>(41%, 3h)              | 3    |
|       | Fe <sub>2</sub> O <sub>3</sub>                   |                         |                                                             |                         |      | 38       | 60                       | <b>0.2</b><br>(38%, 3h)              |      |
|       | LaFeO <sub>3</sub> _NA                           |                         |                                                             |                         |      | 90       | 94                       | <b>0.6</b><br>(90%, 3h)              |      |
|       |                                                  |                         |                                                             |                         | 2    | 75       | 85                       | <b>0.8</b><br>(75%, 2h)              |      |
|       |                                                  |                         |                                                             |                         | 1    | 70       | 80                       | <b>1.4</b><br>(70%, 1h)              |      |
|       |                                                  |                         |                                                             | 200                     | 100  | 82       | <b>0.6</b><br>(100%, 3h) |                                      |      |
|       |                                                  |                         |                                                             | 160                     | 71   | 75       | <b>0.4</b><br>(71%, 3h)  |                                      |      |
|       |                                                  |                         |                                                             | 120                     | 18   | 39       | <b>0.1</b><br>(18%, 3h)  |                                      |      |
|       |                                                  |                         |                                                             | 1.2                     | 0.04 | 180      | 68                       | 98                                   |      |
|       | 1.4                                              |                         |                                                             | 0.05                    | 67   |          | 85                       | <b>0.7</b><br>(67%, 3h)              |      |
| 2.0   | 0.07                                             | 55                      | 86                                                          | <b>0.9</b><br>(55%, 3h) |      |          |                          |                                      |      |
| 2     | Fe <sub>3</sub> O <sub>4</sub>                   | 3.2                     | 0.2                                                         | 180                     | 4    | 57       | 95                       | <b>0.2<sup>e</sup></b>               | 4    |
|       | CoFe <sub>2</sub> O <sub>4</sub>                 |                         |                                                             |                         |      | 73       | 97                       | <b>0.3<sup>e</sup></b>               |      |
|       | NiFe <sub>2</sub> O <sub>4</sub>                 |                         |                                                             |                         |      | 95       | 95                       | <b>0.7<sup>e</sup></b>               |      |
| 3     | $\gamma$ -Fe <sub>2</sub> O <sub>3</sub><br>@HAP | 4.8                     | 0.07                                                        | 180                     | 3    | 40       | 90                       | <b>1.1</b><br>(40%, 3h)              | 5    |
|       |                                                  | 2.4                     |                                                             |                         |      | 65       | 92                       | <b>0.9</b><br>(65%, 3h)              |      |
|       |                                                  | 1.2                     |                                                             |                         |      | 78       | 97                       | <b>0.5</b><br>(78%, 3h)              |      |
|       |                                                  | 2.4                     |                                                             | 160                     |      | 50       | 95                       | <b>0.7</b><br>(50%, 3h)              |      |
|       |                                                  |                         |                                                             | 140                     |      | 33       | 82                       | <b>0.4</b><br>(33%, 3h)              |      |
|       |                                                  |                         |                                                             | 120                     |      | 15       | 81                       | <b>0.2</b><br>(15%, 3h)              |      |
| 4     | MgO                                              | 10                      | 0.55                                                        | 120                     | 5    | 20       | 70                       | <b>0.2</b><br>(20%, 5h)              | 6    |
|       |                                                  |                         |                                                             | 150                     |      | 76       | 71                       | <b>0.6</b><br>(76%, 5h)              |      |
|       |                                                  |                         |                                                             | 170                     |      | 100      | 74                       | <b>0.8</b><br>(100%, 5h)             |      |
|       | Al <sub>2</sub> O <sub>3</sub> -450              |                         |                                                             | 75                      |      | 58       | <b>1.6</b><br>(75%, 5h)  |                                      |      |
|       | ZrO <sub>2</sub>                                 |                         |                                                             | 75                      |      | 53       | <b>1.9</b><br>(75%, 5h)  |                                      |      |
| ZnO   | 74                                               | 65                      | <b>1.3</b><br>(74%, 5h)                                     |                         |      |          |                          |                                      |      |
| 5     | NiO(P)-300                                       | 4.8                     | 0.2                                                         | 120                     | 1    | 73       | 97                       | <b>2.7<sup>e</sup></b>               | 7    |
|       | Commercial NiO                                   |                         |                                                             |                         |      | 18       | 96                       | <b>0.7<sup>e</sup></b>               |      |
|       | NiO-300                                          |                         |                                                             |                         |      | 63       | 91                       | <b>2.3<sup>e</sup></b>               |      |
|       | NiO(P)-400                                       |                         |                                                             |                         |      | 11       | 93                       | <b>0.4<sup>e</sup></b>               |      |

**Table S2** (contd.)

| Entry | Catal.                                         | Mass ratio <sup>a</sup> | C <sup>initial</sup> <sup>b</sup><br>(mol L <sup>-1</sup> ) | T(°C) | t(h) | Conv.(%) | Sel.(%) | TOF(h <sup>-1</sup> ) <sup>c,d</sup> | Ref.      |
|-------|------------------------------------------------|-------------------------|-------------------------------------------------------------|-------|------|----------|---------|--------------------------------------|-----------|
| 6     | MgO                                            | 3.2                     | 0.2                                                         | 150   | 1    | 21       | 77      | <b>0.3</b><br>(21%, 1h)              | 8         |
|       | TiO <sub>2</sub>                               |                         |                                                             |       |      | 29       | 57      | <b>0.8</b><br>(29%, 1h)              |           |
|       | Cr <sub>2</sub> O <sub>3</sub>                 |                         |                                                             |       |      | 21       | 60      | <b>1.1</b><br>(21%, 1h)              |           |
|       | Fe <sub>2</sub> O <sub>3</sub>                 |                         |                                                             |       |      | 29       | 57      | <b>1.6</b><br>(29%, 1h)              |           |
|       | ZrO <sub>2</sub>                               |                         |                                                             |       |      | 32       | 80      | <b>1.2</b><br>(32%, 1h)              |           |
|       | NiO                                            |                         |                                                             |       |      | 54       | 97      | <b>1.3</b><br>(54%, 1h)              |           |
| 7     | <i>h</i> -Ni <sub>3</sub> Al <sub>1</sub> -800 | 3.2                     | 0.2                                                         | 150   | 1    | 48       | >99     | <b>1.1</b><br>(48%, 1h)              | This work |

<sup>a</sup> Mass ratio of furfural to catalyst. <sup>b</sup> Initial molar concentration of FFR. <sup>c</sup> TOF was calculated based on the content of metallic oxides. <sup>d</sup> Calculated based on the data in literature; the numbers in parentheses are the reaction time and the conversion for TOF estimation. <sup>e</sup> Mentioned in literature.

In this work, even based on the NiO content, the TOF value over the *h*-Ni<sub>3</sub>Al<sub>1</sub>-800 still reached 1.1 h<sup>-1</sup>, which is in the same order of magnitude with the values reported in literature. More importantly, the *h*-Ni<sub>3</sub>Al<sub>1</sub>-800 can be recycled at least 12 times without loss of activity, indicative of its higher stability for STH reaction than those reported in literature.

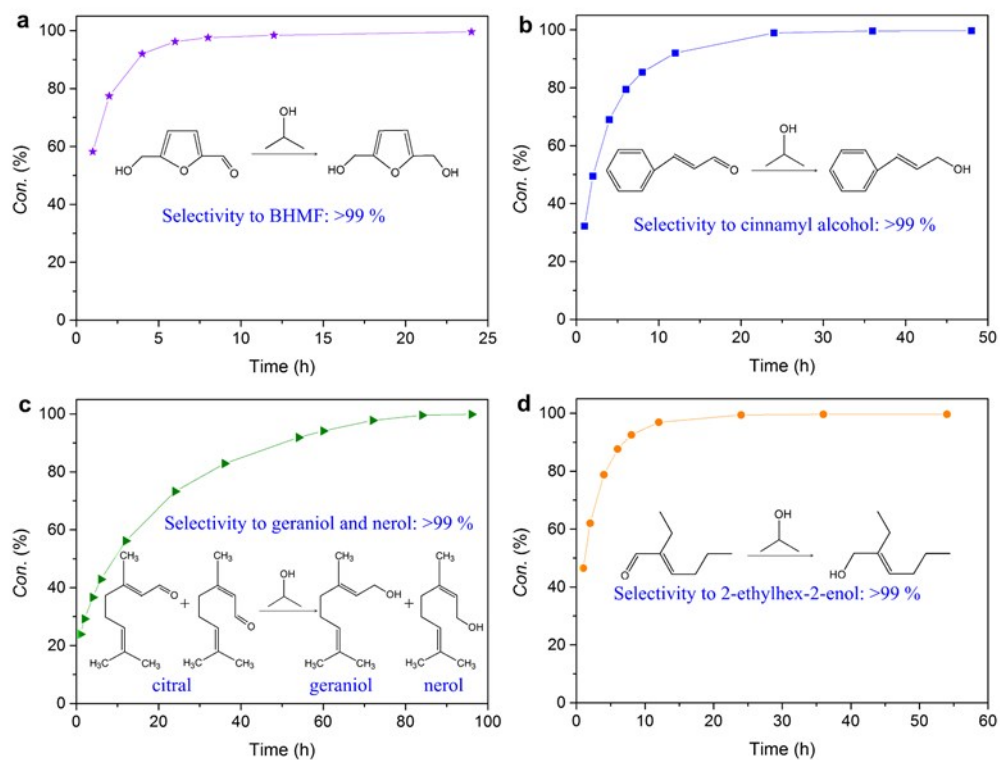

**Fig. S9** Catalytic performances of *h*-Ni<sub>3</sub>Al<sub>1</sub>-800 for selective transfer hydrogenation of (a) HMF to BHMf, (b) *trans*-cinnamadehyde to cinnamyl alcohol, (c) citral to geraniol or nerol and (d) 2-ethyl-2-hexenal to 2-ethylhex-2-enol. Reaction conditions: 0.5 mmol substrate, 5 mL 2-propanol, 80 mg catalyst, 120 °C.



**Table S3** Ni 2p XPS results of different catalysts.

| Catal.                                                                | Ni <sup>2+</sup><br>(NiO)                       |                           |                | Ni <sup>δ+</sup><br>(Ni-O-Al, 2 < δ < 3) |                           |                | Ni <sup>3+</sup><br>(Ni <sub>2</sub> O <sub>3</sub> or NiOOH) |                           |                | O <sup>2-</sup><br>(NiO)  | O <sup>2-</sup><br>(Ni-O-Al) | O <sup>2-</sup><br>(Ni <sub>2</sub> O <sub>3</sub> or<br>NiOOH) |
|-----------------------------------------------------------------------|-------------------------------------------------|---------------------------|----------------|------------------------------------------|---------------------------|----------------|---------------------------------------------------------------|---------------------------|----------------|---------------------------|------------------------------|-----------------------------------------------------------------|
|                                                                       | Binding<br>energy<br>(eV)                       | FWHM <sup>c</sup><br>(eV) | Percent<br>(%) | Binding<br>energy<br>(eV)                | FWHM <sup>c</sup><br>(eV) | Percent<br>(%) | Binding<br>energy<br>(eV)                                     | FWHM <sup>c</sup><br>(eV) | Percent<br>(%) | Binding<br>energy<br>(eV) | Binding<br>energy<br>(eV)    | Binding<br>energy<br>(eV)                                       |
|                                                                       | <i>h</i> -Ni <sub>3</sub> Al <sub>1</sub> -1000 | 854.4                     | 2.06           | 27.5                                     | 855.6                     | 2.05           | 29.2                                                          | 856.8                     | 2.11           | 43.3                      | --                           | 530.8                                                           |
| <i>h</i> -Ni <sub>3</sub> Al <sub>1</sub> -800                        | 854.4                                           | 2.02                      | 20.3           | 855.6                                    | 2.15                      | 60.1           | 856.8                                                         | 2.13                      | 19.6           | --                        | 530.8                        | --                                                              |
| Spent <i>h</i> -Ni <sub>3</sub> Al <sub>1</sub> -<br>800 <sup>a</sup> | 854.4                                           | 2.02                      | 19.8           | 855.6                                    | 2.10                      | 62.2           | 856.8                                                         | 2.10                      | 17.9           | --                        | 530.8                        | --                                                              |
| <i>h</i> -Ni <sub>3</sub> Al <sub>1</sub> -500                        | 854.4                                           | 2.02                      | 31.3           | 855.4                                    | 2.05                      | 29.7           | 856.5                                                         | 2.11                      | 39.0           | --                        | 530.6                        | 531.4                                                           |
| <i>h</i> -Ni <sub>3</sub> Al <sub>1</sub> -300                        | 854.4                                           | 1.90                      | 2.3            | 855.2                                    | 2.06                      | 26.6           | 856.2                                                         | 2.13                      | 71.1           | --                        | 530.5                        | 531.5                                                           |
| Spent <i>h</i> -Ni <sub>3</sub> Al <sub>1</sub> -<br>300 <sup>b</sup> | 854.7                                           | 1.95                      | 10.7           | 855.5                                    | 2.02                      | 38.8           | 856.7                                                         | 2.12                      | 50.5           | --                        | 530.5                        | 531.5 <sup>↓d</sup>                                             |
| NiO-800                                                               | 854.4                                           | 2.02                      | 36.0           | --                                       | --                        | --             | 856.2                                                         | 2.12                      | 64.0           | 529.9                     | --                           | 531.9                                                           |
| NiO-300                                                               | 854.2                                           | 2.02                      | 32.6           | --                                       | --                        | --             | 855.8                                                         | 2.12                      | 67.4           | 529.4                     | --                           | 531.2                                                           |
| Spent NiO-300 <sup>b</sup>                                            | 854.3                                           | 2.02                      | 42.0           | --                                       | --                        | --             | 856.0                                                         | 2.12                      | 58.0           | 529.7                     | --                           | 531.3 <sup>↓d</sup>                                             |

<sup>a</sup> Recycled 12 times. <sup>b</sup> Recycled 6 times. <sup>c</sup> The full width at half-maximum (FWHM). <sup>d</sup> ↓ indicates that the amount of O<sup>2-</sup> species in Ni<sub>2</sub>O<sub>3</sub> or NiOOH after recycling decreases.

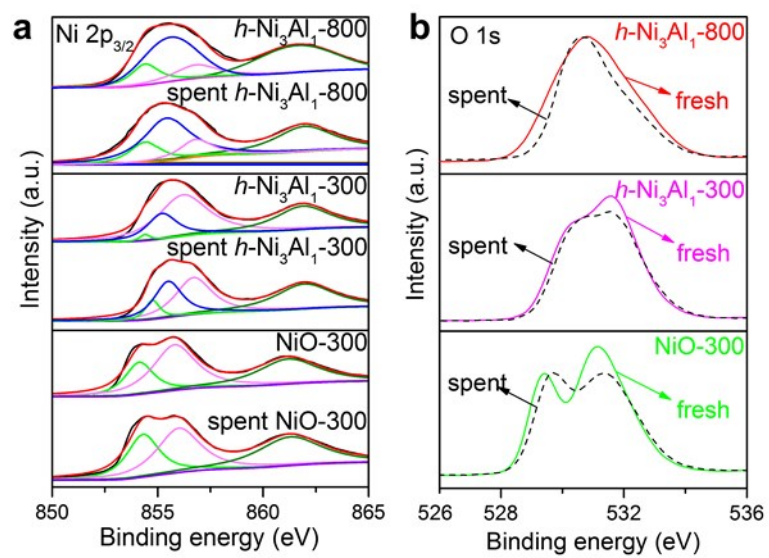

**Fig. S10** (a) Ni  $2p_{3/2}$  and (b) O  $1s$  XPS spectra of NiO and  $h\text{-Ni}_3\text{Al}_1$  catalysts before and after recycling (12 times for  $h\text{-Ni}_3\text{Al}_1\text{-800}$ , 6 times for  $h\text{-Ni}_3\text{Al}_1\text{-300}$  and NiO-300, respectively).

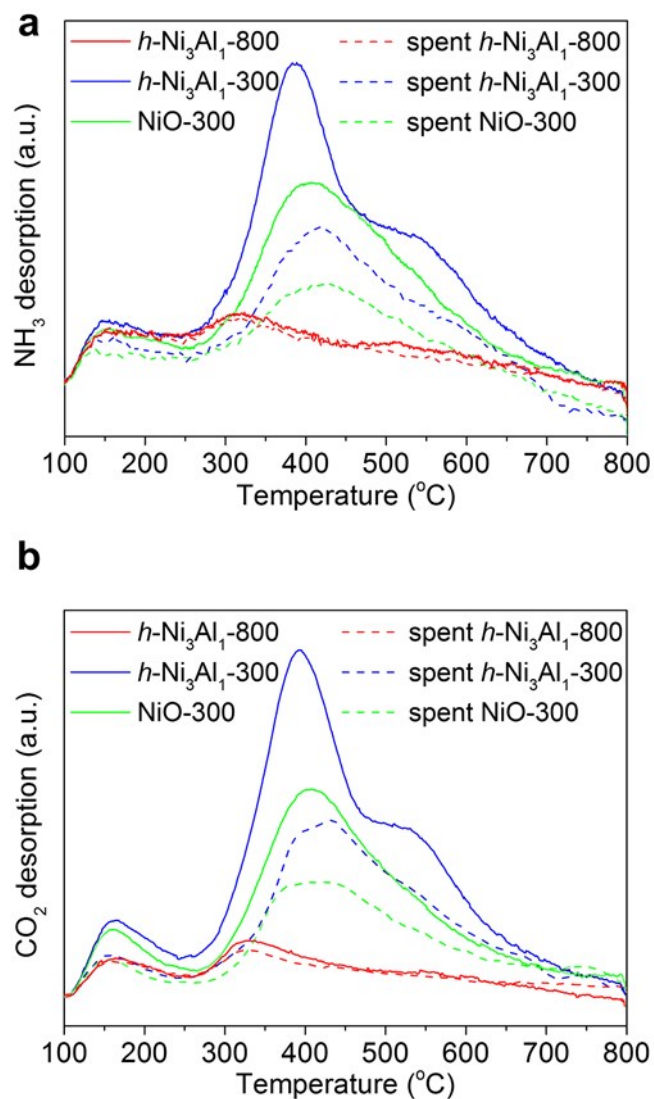

**Fig. S11** a)  $\text{NH}_3$ -TPD and b)  $\text{CO}_2$ -TPD profiles of the catalysts before and after recycling.

**Table S4** Acid-base properties of different catalysts.

| Catal.                                                            | Acid site density <sup>a</sup><br>(mmol <sub>NH3</sub> g <sub>cat</sub> <sup>-1</sup> ) | Base site density <sup>b</sup><br>(mmol <sub>CO2</sub> g <sub>cat</sub> <sup>-1</sup> ) |
|-------------------------------------------------------------------|-----------------------------------------------------------------------------------------|-----------------------------------------------------------------------------------------|
| <i>h</i> -Ni <sub>3</sub> Al <sub>1</sub> -1000                   | 0.6                                                                                     | 0.5                                                                                     |
| <i>h</i> -Ni <sub>3</sub> Al <sub>1</sub> -800                    | 1.3                                                                                     | 1.4                                                                                     |
| <i>h</i> -Ni <sub>3</sub> Al <sub>1</sub> -500                    | 2.0                                                                                     | 2.4                                                                                     |
| <i>h</i> -Ni <sub>3</sub> Al <sub>1</sub> -300                    | 3.9                                                                                     | 5.3                                                                                     |
| NiO-800                                                           | 0.0                                                                                     | 0.2                                                                                     |
| NiO-300                                                           | 3.0                                                                                     | 3.5                                                                                     |
| Spent <i>h</i> -Ni <sub>3</sub> Al <sub>1</sub> -800 <sup>c</sup> | 1.3                                                                                     | 1.3                                                                                     |
| Spent <i>h</i> -Ni <sub>3</sub> Al <sub>1</sub> -300 <sup>d</sup> | 2.2                                                                                     | 2.7                                                                                     |
| Spent NiO-300 <sup>d</sup>                                        | 1.7                                                                                     | 2.1                                                                                     |

<sup>a</sup> Obtained from NH<sub>3</sub>-TPD. <sup>b</sup> Obtained from CO<sub>2</sub>-TPD. <sup>c</sup> Recycled 12 times. <sup>d</sup> Recycled 6 times.

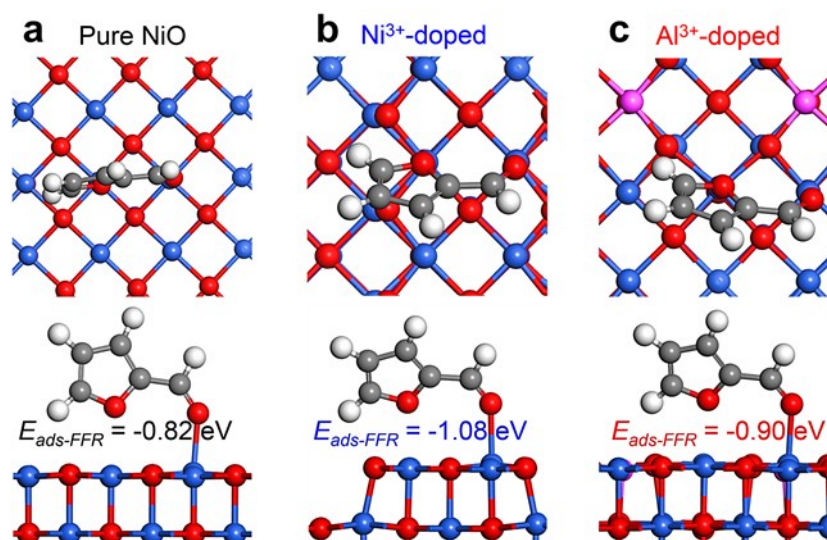

**Fig. S12** The top and side view of the most stable adsorption configuration of FFR on (a) pure NiO(200), (b) Ni<sup>3+</sup>-doped Ni(200) and (c) Al<sup>3+</sup>-doped NiO(200). The blue, pink, red, gray and white spheres represent Ni, Al, O, C and H atoms, respectively.

## Notes and references

- 1 G. H. Wang, J. Hilgert, F. H. Richter, F. Wang, H. J. Bongard, B. Spliethoff, C. Weidenthaler and F. Schuth, *Nat. Mater.*, 2014, **13**, 293-300.
- 2 X. Li, L. Zheng and Z. Hou, *Fuel*, 2018, **233**, 565-571.
- 3 P. Xiao, J. Zhu, D. Zhao, Z. Zhao, F. Zaera and Y. Zhu, *ACS Appl. Mater. Interfaces*, 2019, **11**, 15517-15527.
- 4 J. He, S. Yang and A. Riisager, *Catal. Sci. Technol.*, 2018, **8**, 790-797.
- 5 F. Wang and Z. Zhang, *Chem. Eng.*, 2017, **5**, 942-947.
- 6 N. S. Biradar, A. M. Hengne, S. S. Sakate, R. K. Swami and C. V. Rode, *Catal. Lett.*, 2016, **146**, 1611-1619.
- 7 J. He, M. R. Nielsen, T. W. Hansen, S. Yang and A. Riisager, *Catal. Sci. Technol.*, 2019, **9**, 1289-1300.
- 8 J. He, L. Schill, S. Yang and A. Riisager, *ACS Sustainable Chem. Eng.*, 2018, **6**, 17220-17229
